# Supplementary material
Source: Elsevier journal article supplement (http://library.osu.edu/sites/msa/suppmat/v236.i1.pp42-51/mmc7.pdf)
Supplement: mmc7 [file mmc7.pdf]

# $^{49}\text{Ti}^{35}\text{Cl}$ Assigned Transitions

Transitions are labeled using four columns, the excited state J value ( $J'$ ), the ground state J value ( $J''$ ), the observed transition wavenumber (Observed) and the fit residual multiplied by  $10^3$  (O-C).

${}^4\Gamma_{5/2} - X^4\Phi_{3/2} (0,0)$ 

| J'   | J''  | Observed   | O-C  | J'   | J''  | Observed   | O-C  |
|------|------|------------|------|------|------|------------|------|
| 9.5  | 8.5  | 23847.2642 | 4.8  | 12.5 | 13.5 | 23839.9156 | -3.6 |
| 10.5 | 9.5  | 23847.5898 | 2.0  | 13.5 | 14.5 | 23839.6030 | -6.8 |
| 11.5 | 10.5 | 23847.9202 | 3.3  | 14.5 | 15.5 | 23839.2976 | -3.7 |
| 12.5 | 11.5 | 23848.2456 | -1.2 | 15.5 | 16.5 | 23838.9922 | -1.5 |
| 13.5 | 12.5 | 23848.5775 | 0.1  | 16.5 | 17.5 | 23838.6916 | 4.6  |
| 14.5 | 13.5 | 23848.9108 | 1.9  | 17.5 | 18.5 | 23838.3800 | -1.2 |
| 15.5 | 14.5 | 23849.2392 | -1.9 | 18.5 | 19.5 | 23838.0778 | 1.4  |
| 16.5 | 15.5 | 23849.5737 | -0.4 | 19.5 | 20.5 | 23837.7764 | 3.9  |
| 17.5 | 16.5 | 23849.9055 | -2.4 | 20.5 | 21.5 | 23837.4711 | 1.5  |
| 18.5 | 17.5 | 23850.2450 | 2.5  | 21.5 | 22.5 | 23837.1698 | 2.1  |
| 19.5 | 18.5 | 23850.5782 | 0.3  | 22.5 | 23.5 | 23836.8695 | 2.6  |
| 20.5 | 19.5 | 23850.9120 | -2.2 | 23.5 | 24.5 | 23836.5649 | -2.1 |
| 21.5 | 20.5 | 23851.2480 | -3.3 | 24.5 | 25.5 | 23836.2719 | 3.6  |
| 22.5 | 21.5 | 23851.5836 | -5.6 | 25.5 | 26.5 | 23835.9709 | 0.3  |
| 23.5 | 22.5 | 23851.9268 | -1.1 | 26.5 | 27.5 | 23835.6744 | 0.5  |
| 25.5 | 24.5 | 23852.6095 | 1.5  | 27.5 | 28.5 | 23835.3769 | -1.6 |
| 26.5 | 25.5 | 23852.9536 | 4.2  | 28.5 | 29.5 | 23835.0826 | -1.5 |
| 27.5 | 26.5 | 23853.2920 | 0.4  | 29.5 | 30.5 | 23834.7891 | -1.8 |
| 28.5 | 27.5 | 23853.6352 | 0.4  |      |      |            |      |
